# Supplementary material
Source: PubMed Central journal article supplement (PMC2629218)
Supplement: 0809211106_0809211106SI.pdf [file 0809211106_0809211106SI.pdf]

# Supporting Information

Pavlov et al. 10.1073/pnas.0809211106

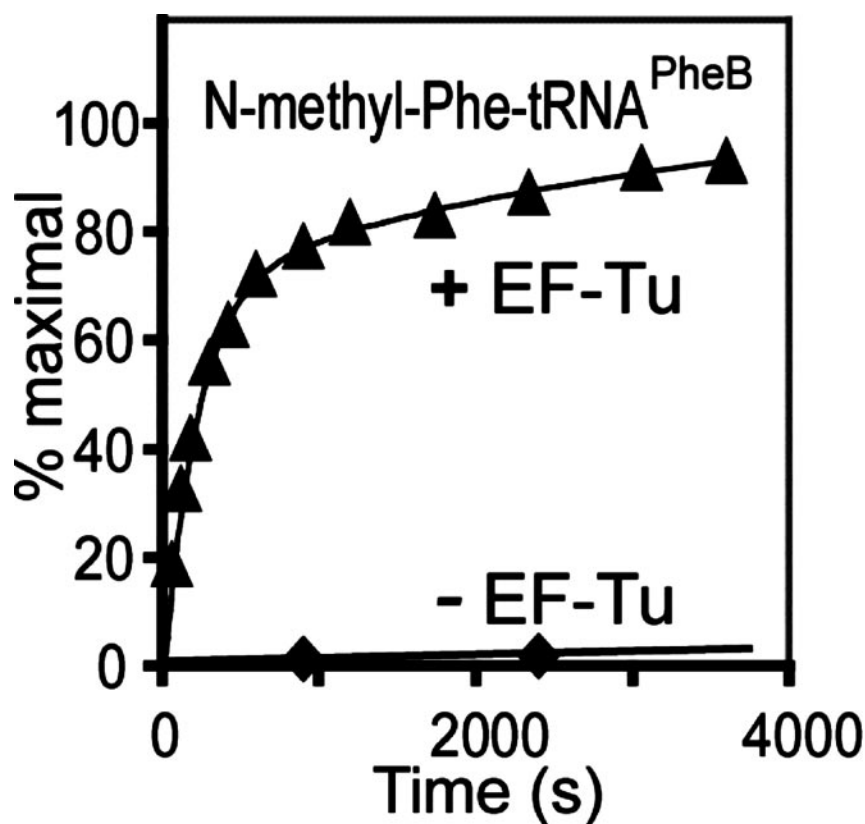

**Fig. S1.** Dependence on EF-Tu of dipeptide synthesis from fMet-tRNA<sup>fMet</sup> and N-methyl-Phe-tRNA<sup>Phe</sup> at Phe codon UUC. Diamonds, kinetics of dipeptide synthesis in the absence of EF-Tu. Triangles, kinetics of dipeptide synthesis in the presence of EF-Tu (taken from Fig. 2D for comparative purposes).

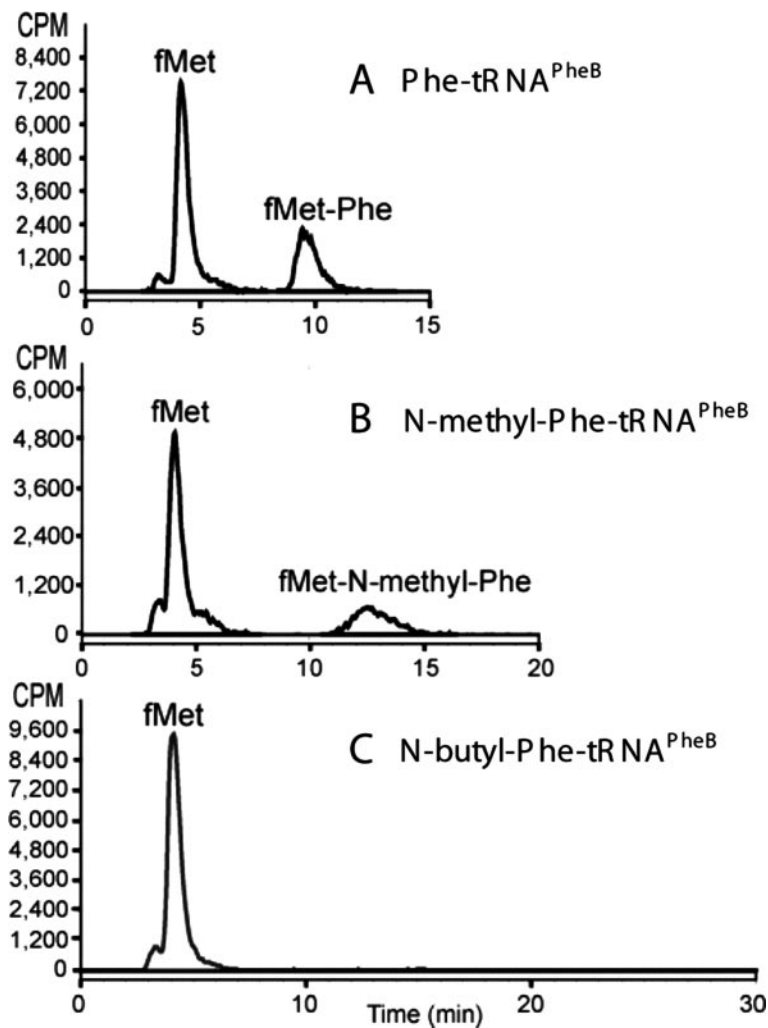

**Fig. S2.** Reversed-phase HPLC elution profiles of dipeptide products from [ $^3\text{H}$ ]fMet-tRNA<sup>fMet</sup> and tRNA<sup>PheB</sup> charged with Phe (A), *N*-methyl-Phe (B), and *N*-butyl-Phe (C) using Phe codon UUC. Translation reactions were carried out for 0.15 s (A), 1,800 s = 30 min (B), and 1,800 s (C), and samples for HPLC were prepared as described in *Materials and Methods*. Counts per min (CPM) are plotted against elution time (min). (A–C) Elution for min 0–20 was isocratic with 42% methanol/0.1% trifluoroacetic acid. (C) Elution for min 20–25 was at 50% methanol/0.1% trifluoroacetic acid, and elution for min 25–30 was at 74% methanol/0.1% trifluoroacetic acid.

**Table S1. Summary of dipeptide synthesis rates**

| Aminoacyl-tRNA                    | Codon | $k_{\text{dip}}, \text{s}^{-1}$ | $k_{\text{GTP}}, \text{s}^{-1}$ | $k_{\text{acc,pep}}, \text{s}^{-1}$ |
|-----------------------------------|-------|---------------------------------|---------------------------------|-------------------------------------|
| Phe-tRNA <sup>Phe</sup>           | UUU   | 51 ( $\pm 5$ )                  | 129 ( $\pm 10$ )                | 84 ( $\pm 14$ )                     |
| Phe-tRNA <sup>Phe</sup>           | UUC   | 54 ( $\pm 5$ )                  | 130 ( $\pm 10$ )                | 92 ( $\pm 15$ )                     |
| Phe-tRNA <sup>Bulk</sup>          | UUC   | 49 ( $\pm 4$ )                  | 112 ( $\pm 10$ )                | 87 ( $\pm 14$ )                     |
| Phe-tRNA <sup>PheB</sup>          | UUC   | 41 ( $\pm 4$ )                  | 77 ( $\pm 4$ )                  | 90 ( $\pm 19$ )                     |
| N-methyl-Phe-tRNA <sup>PheB</sup> | UUC   | 0.005 ( $\pm 0.0003$ )          | 19 ( $\pm 3$ )                  | 0.005 ( $\pm 0.0003$ )              |
| N-butyl-Phe-tRNA <sup>PheB</sup>  | UUC   | Undetectable                    | 15 ( $\pm 7$ )                  | Undetectable                        |
| Ala-tRNA <sup>PheB</sup>          | UUC   | 27 ( $\pm 5$ )                  | 76 ( $\pm 8$ )                  | 42 ( $\pm 12$ )                     |
| Pro-tRNA <sup>PheB</sup>          | UUC   | 1.75 ( $\pm 0.2$ )              | 62 ( $\pm 12$ )                 | 1.8 ( $\pm 0.2$ )                   |
| Pro-tRNA <sup>Bulk</sup>          | CCG   | 16 ( $\pm 2$ )                  | 80 ( $\pm 9$ )                  | 20 ( $\pm 3$ )                      |
| Pro-tRNA <sup>Bulk</sup>          | CCA   | 15 ( $\pm 2$ )                  | 53 ( $\pm 8$ )                  | 21 ( $\pm 4$ )                      |
| Pro-tRNA <sup>Bulk</sup>          | CCU   | 14 ( $\pm 2$ )                  | 42 ( $\pm 8$ )                  | 21 ( $\pm 4$ )                      |
| Pro-tRNA <sup>Bulk</sup>          | CCC   | 8.6 ( $\pm 1.2$ )               | 20 ( $\pm 2$ )                  | 15 ( $\pm 4$ )                      |

Data are expressed as rates for GTP hydrolysis ( $k_{\text{GTP}}$ ) and dipeptide synthesis from fMet-tRNA<sup>fMet</sup> ( $k_{\text{dip}}$ ). The rates are calculated from Table 1 by  $k = 1/\tau$ . Thus,  $k_{\text{acc,pep}} = 1/(1/k_{\text{dip}} - 1/k_{\text{GTP}})$ .

| mRNA                  | Sequence                                                                                   |
|-----------------------|--------------------------------------------------------------------------------------------|
| mMF <sub>UUC</sub> Tl | gggaauucgggcccuuguuaacaaauaaggagguauauc<br>AUG UUC ACG AUU uaaauugcagaaaaaaaaaaaaaaaaaaaaa |
| mMF <sub>UUU</sub> Tl | gggaauucgggcccuuguuaacaaauaaggagguauauc<br>AUG UUU ACG AUU uaaauugcagaaaaaaaaaaaaaaaaaaaaa |
| mMP <sub>CCA</sub> F  | gggaauucgggcccuuguuaacaaauaaggagguauauc<br>AUG CCA UUC uaaucugcagaaaaaaaaaaaaaaaaaaagcg    |
| mMP <sub>CCC</sub> F  | gggaauucgggcccuuguuaacaaauaaggagguauauc<br>AUG CCC UUC uaaucugcagaaaaaaaaaaaaaaaaaaagcg    |
| mMP <sub>CCG</sub> F  | gggaauucgggcccuuguuaacaaauaaggagguauauc<br>AUG CCG UUC uaaucugcagaaaaaaaaaaaaaaaaaaagcg    |
| mMP <sub>CCU</sub> F  | gggaauucgggcccuuguuaacaaauaaggagguauauc<br>AUG CCU UUC uaaucugcagaaaaaaaaaaaaaaaaaaagcg    |

All mRNAs were prepared by transcription with T7 RNA polymerase, purified by binding to an oligo(dT) column, and have the same upstream sequence including a strong Shine–Dalgarno ribosome-binding sequence (uaaggaggu). Sense codons are in capitals in the sequences. Translated elongator codons are in subscripts in the mRNA names.
